# Supplementary material
Source: Springer Nature journal article supplement (https://www.springermedizin.de/resource/supplementary/12993_2005_115_MOESM3_ESM.pdf/9617108)

# P2 gel filtration

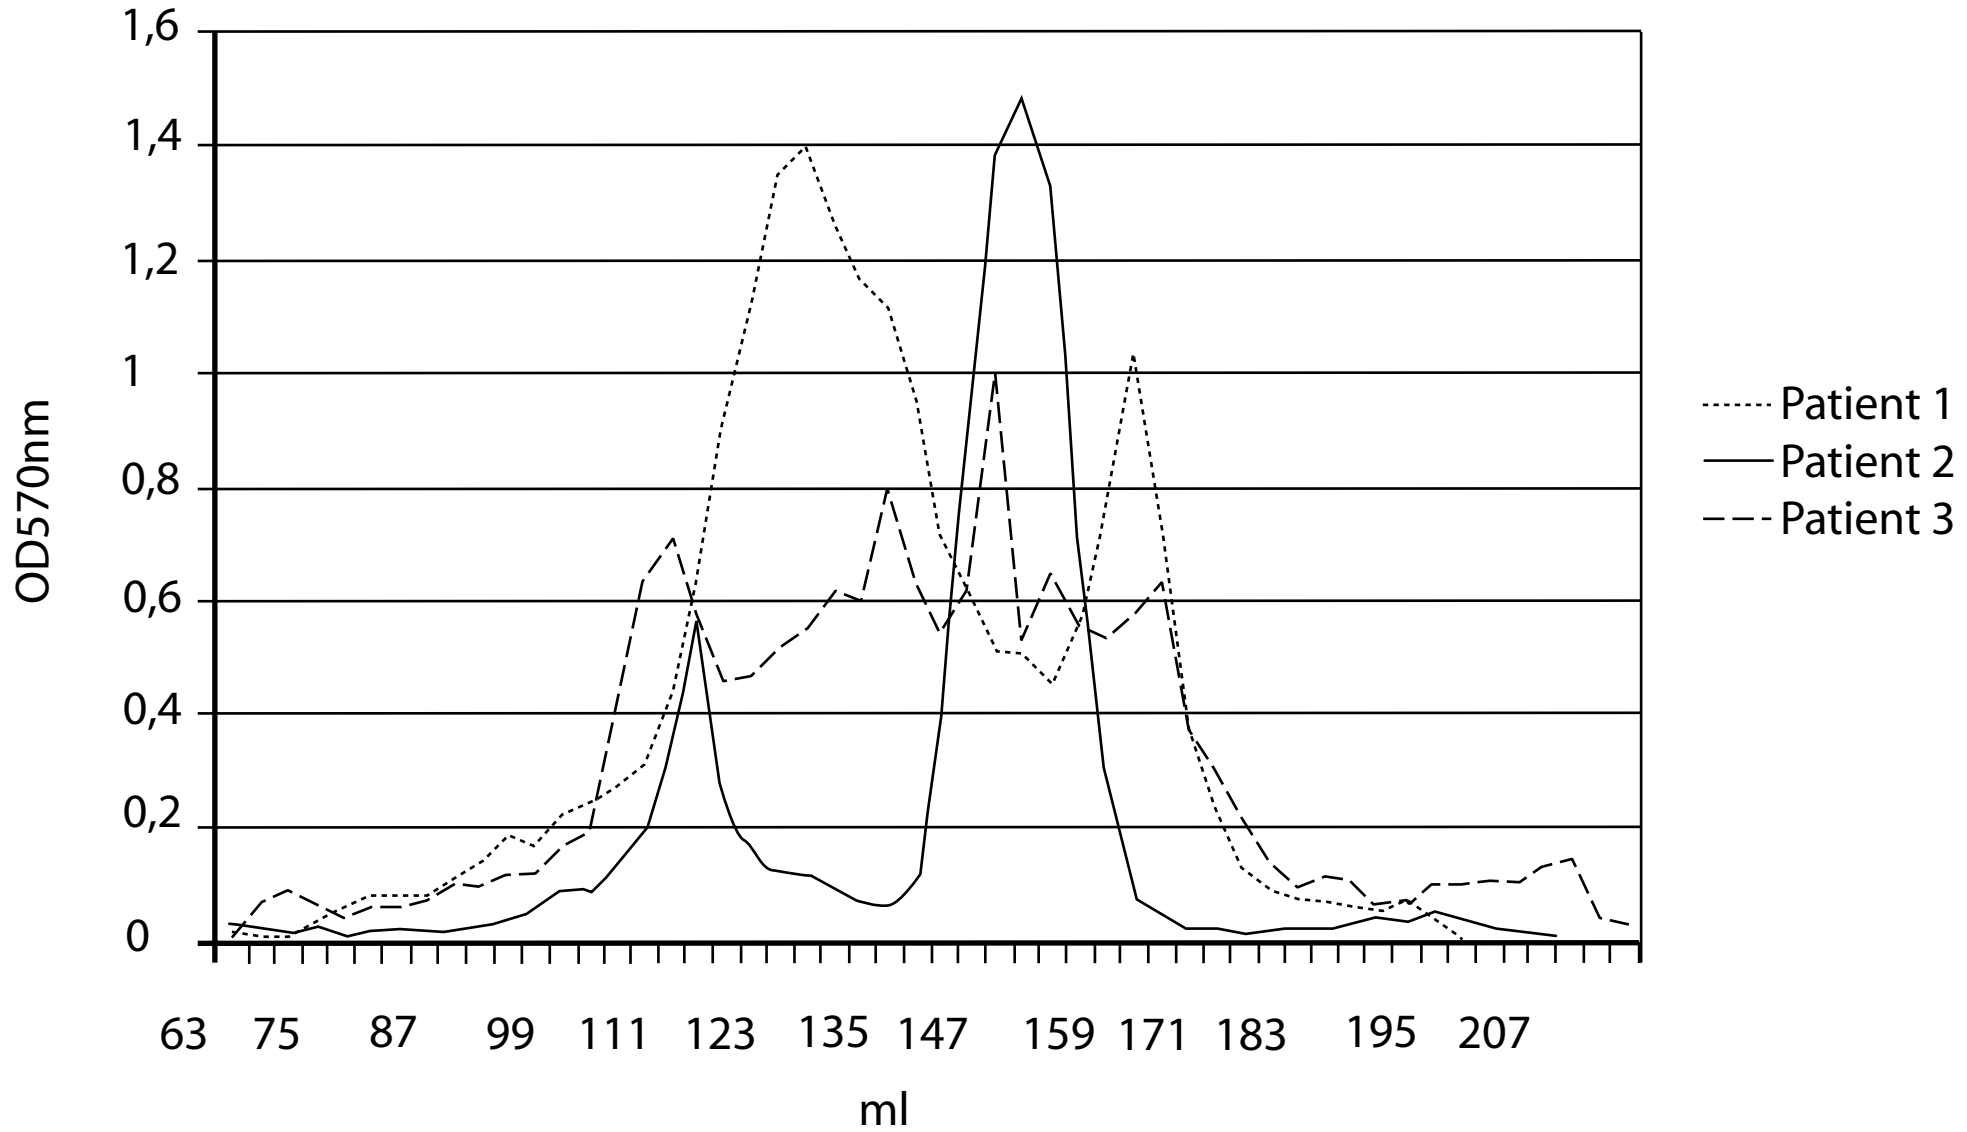

Supplement: MOESM3 [file 9617108]
